# Supplementary material
Source: Springer Nature journal article supplement (https://www.springermedizin.de/resource/supplementary/12955_2004_254_MOESM1_ESM.pdf/9559994)

SF-6D domains

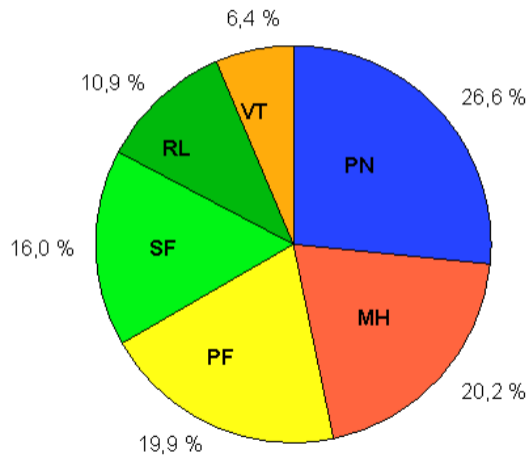

EQ-5D domains

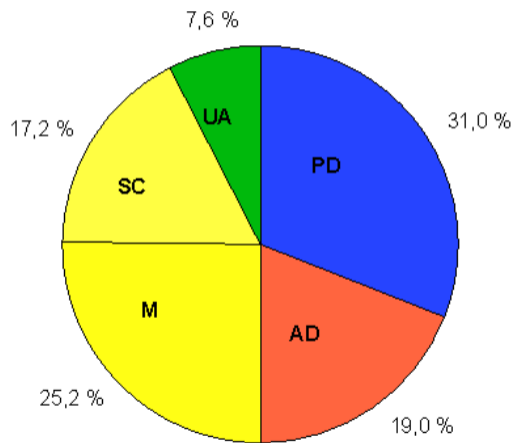

Supplement: MOESM1 [file 9559994]
